# Supplementary material
Source: publisher site journal article supplement (https://www.dovepress.com/get_supplementary_file.php?f=357179.docx)
Supplement: Supplementary file 1 [file get_supplementary_file.php]

# Supplementary Material

**Supplementary Table 1 :** Details of search strategy employed for each database.

| **Database** | **Search term** | **No. of results** |
| --- | --- | --- |
| PubMed | (cardiac[title/abstract] or congestive[title/abstract] or heart[title/abstract] or failure[title/abstract] ccf[title/abstract] or hf[title/abstract])  AND (counsel* or educa* or tele* or support or dyadic or intervention or program* or programme or dyad*)  AND (caregiver[title/abstract] or carer[title/abstract] or caretaker[title/abstract] or care*[title/abstract] or dyad[title/abstract] or family[title/abstract] or sibling[title/abstract] or friend[title/abstract] or support[title/abstract] or nurs*[title/abstract])  AND (qol or depress* or lonely or loneliness or quality or mood or psycho* or psychi* or coping or cope) | 2696 |
| EMBASE | (cardiac:ti,ab or congestive:ti,ab or heart:ti,ab or failure:ti,ab ccf:ti,ab or hf:ti,ab)  AND (counsel* or educa* or tele* or support or dyadic or intervention or program or programme)  AND (caregiver:ti,ab or carer:ti,ab or caretaker:ti,ab or care*:ti,ab or dyad:ti,ab or dyadic:ti,ab or family:ti,ab or sibling:ti,ab or friend:ti,ab or support:ti,ab or nurs*:ti,ab)  AND (qol or depress* or lonely or loneliness or quality or mood or psycho* or psychi* or coping or cope) | 3435 |
| CENTRAL | (cardiac or congestive or heart or failure ccf or hf) in Title Abstract Keyword  AND (counsel* or educa* or tele* or support or dyadic or intervention or program* or programme or dyad*) in All Text  AND (caregiver or carer or caretaker or care* or dyad or dyadic or family or sibling or friend or support or nurs*) in Title Abstract Keyword  AND (qol or depress* or lonely or loneliness or quality or mood or psycho* or psychi* or coping or cope) in All Text | 10822 |

**Supplementary table 2:** Quality assessment of included randomized controlled trials using the Jadad scale. A score of 1 was awarded if the study met the criterion stated in the respective heading and a score of –1 was awarded if the study did not meet the criterion. A total score was computed over a total score of 5 by summing up the individual scores across the row.

| Study | Randomisation mentioned? | Is method of randomisation appropriate? | Is blinding mentioned? | Is method of blinding appropriate? | Were the number of reasons for withdrawal in each group stated? | Total score /5 |
| --- | --- | --- | --- | --- | --- | --- |
| Etemadifar S. et al.  201424 | 1 | 1 |  |  | 1 | 3 |
| Hu X.L. et al.  201625 | 1 | 1 | 1 | 1 | 1 | 5 |
| Lijeroos M et al.  201626 | 1 | 1 | 1 | 1 | 1 | 5 |
| Chiang L. C. et al.  201215 |  |  |  |  |  | 1 |
| Dionne-Odom J. N et al. 202027 | 1 | 1 | 1 | 1 | 1 | 5 |
| Ng AYM et al.  201728 | 1 | 1 | 1 | 1 |  | 4 |
| Barutcu CD et al.  201620 |  |  |  |  | 1 | 1 |
| Srisuk N et al.  201629 | 1 | 1 | 1 | 1 | 1 | 5 |
| Fathani M. et al.  201630 | 1 | 1 |  |  |  | 2 |
| Borji M et al. 201821 | 1 | 1 |  |  | 1 | 3 |
| Bakitas M. et al.  201731 |  |  |  |  | 1 | 1 |
| Lang CC et al.  201819 | 1 | 1 | 1 | 1 |  | 4 |
| Piette JD et al.  201516 | 1 | 1 |  |  |  | 2 |
| Gary R. Dunbar SB et al. 201832 | 1 | 1 | 1 |  | 1 | 4 |
| Sebern MD et al.  201122 |  |  |  |  | 1 | 1 |
| Susanna Agren et al. 201233 | 1 | 1 |  |  |  | 2 |
| Susanna Agren et al. 20152 | 1 | 1 |  |  | 1 | 3 |
| Lofvenmark C et al. 201234 | 1 | 1 |  |  | 1 | 3 |
| McMillan SC et al.  201317 | 1 | 1 | 1 | 1 |  | 4 |
| Jennifer Wingham et al. 201918 | 1 | 1 | 1 | 1 |  | 4 |
| Piamjariyakul U et al. 201514 | 1 | 1 | 1 | 1 | 1 | 5 |
